# Supplementary material for: Morphology-engineered and TiO2(B)-introduced anatase TiO2as an advanced anode material for lithium-ion batteries
Source: Royal Society of Chemistry journal article supplement (doi:10.1039/c5ta03598h), 2015-01-01
Supplement: c5ta03598h1.pdf [file c5ta03598h1.pdf]

## Supporting information

### **Morphology-engineered and TiO<sub>2</sub> (B)-introduced anatase TiO<sub>2</sub> as advanced anode materials for lithium-ion batteries**

Qinghua Tian,<sup>a</sup> Zhengxi Zhang,<sup>\*a</sup> Li Yang<sup>\*ab</sup> and Shin-ichi Hirano<sup>b</sup>

<sup>a</sup>School of Chemistry and Chemical Engineering, Shanghai Jiao Tong University, Shanghai

200240, P. R. China

<sup>b</sup>Hirano Institute for Materials Innovation, Shanghai Jiao Tong University, Shanghai 200240, P. R.

China

\*Corresponding author e-mail address: liyangce@sjtu.edu.cn,

zhengxizhang@sjtu.edu.cn (Z.X. Zhang)

Tel: +86 21 54748917, Fax: +86 21 54741297

---

\* Corresponding author. Tel.: +86 21 54748917; fax: +86 21 54741297.  
E-mail address: liyangce@sjtu.edu.cn (L. Yang), zhengxizhang@sjtu.edu.cn (Z.X. Zhang).

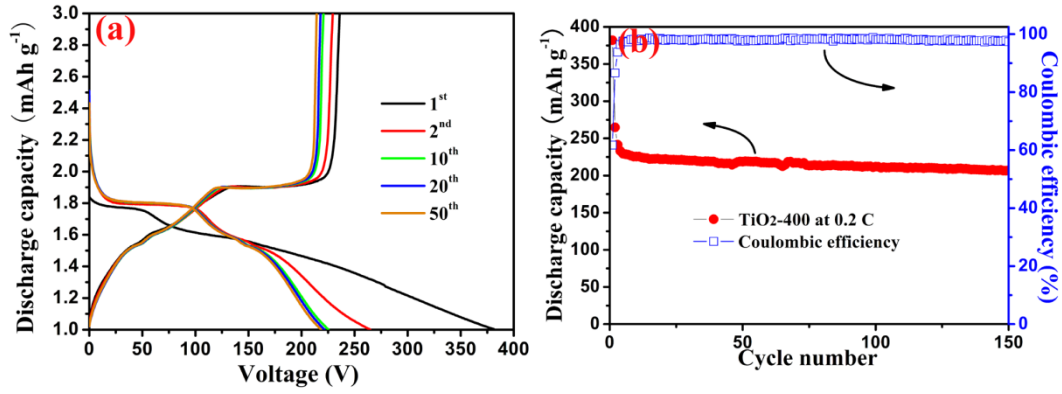

**Figure S1.** (a) Discharge/charge profiles of TiO<sub>2</sub>-400 at 0.2 C. (b) Cycling performance of TiO<sub>2</sub>-400 at 0.2 C.

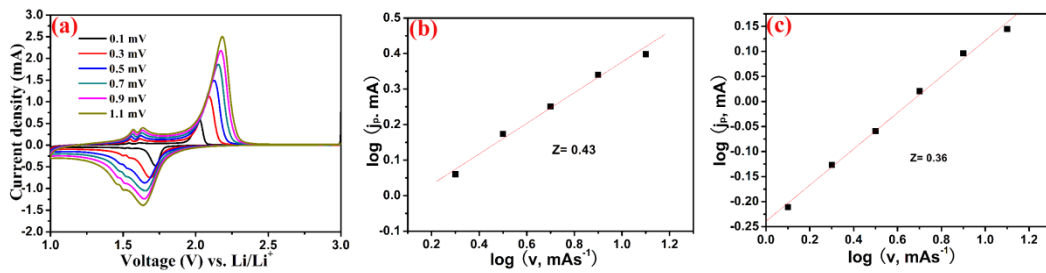

**Figure S2.** (a) Cyclic voltammograms of TiO<sub>2</sub>-500 at six various scan rates; (b) and (c) Plots of log (current density)–log (scan rate), that is, log (j<sub>p</sub>, mA)–log (v, mV s<sup>-1</sup>), based on the cyclic voltammograms in (a).

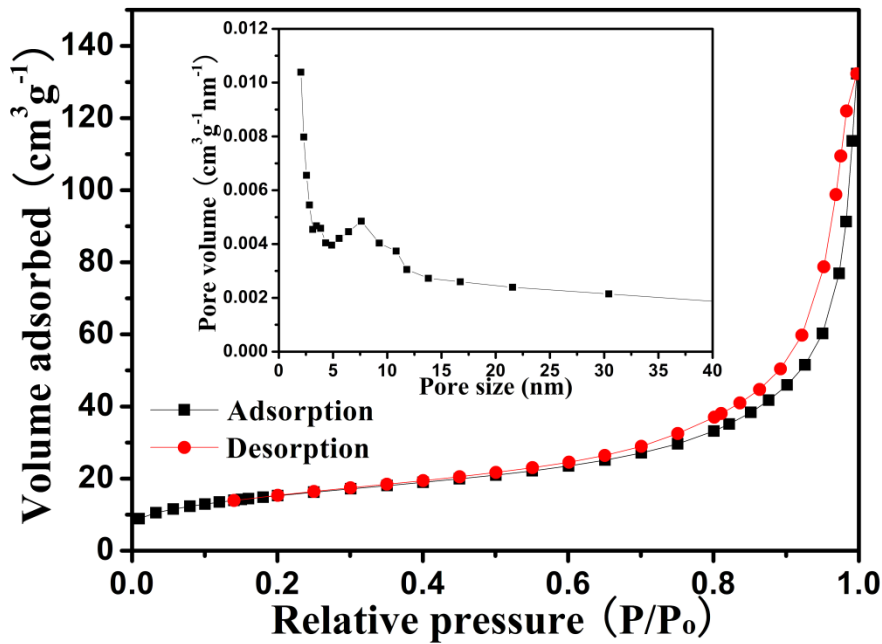

**Figure S3.** N<sub>2</sub> adsorption/desorption isotherms and the corresponding pore size distributions (inset) of TiO<sub>2</sub>-MB/400.
